# Supplementary material
Source: publisher site journal article supplement (https://www.dovepress.com/article/374296)
Supplement: Supplementary file 1 [file get_supplementary_file.php]

**TABLE 1: LIST OF SUB-COUNTIES AND RESPECTIVE PARISHES INCLUDED IN THE STUDY**

| <b>Sub county</b>  | <b>Parish</b> |
|--------------------|---------------|
| Bukanga            | Namukubembe   |
|                    | Budondo       |
|                    | Busalamu      |
| Ikumbya            | Ikumbya       |
|                    | Inuula        |
|                    | Ntayigirwa    |
| Luuka Town council | Kiyunga       |
|                    | Lwanda        |
|                    | Budhabangula  |
| Waibhuga           | Busiuro       |
|                    | Walibo        |
|                    | Butimbwa      |

**TABLE 2: VARIANCE INFLATION FACTORS**

| <b>Variable</b>                      | <b>VIF</b> | <b>1/VIF</b> |
|--------------------------------------|------------|--------------|
| Marital status                       | 11.28      | 0.0887       |
| Partner presence                     | 11.12      | 0.0899       |
| Working status                       | 2.78       | 0.3599       |
| Daily earnings                       | 2.48       | 0.4036       |
| Provider Cadre                       | 2.03       | 0.4919       |
| Type of Health facility              | 1.97       | 0.5083       |
| Pregnancy wanted                     | 1.39       | 0.7171       |
| Mother's age                         | 1.39       | 0.7181       |
| Social support                       | 1.39       | 0.7204       |
| Knowledge of pregnancy danger signs  | 1.36       | 0.7367       |
| Children ever born                   | 1.35       | 0.7396       |
| Decisions on Healthcare              | 1.34       | 0.7444       |
| Distance to HF                       | 1.31       | 0.7661       |
| Knowledge of family planning methods | 1.29       | 0.7757       |
| Partner's age                        | 1.23       | 0.8120       |
| Education level                      | 1.19       | 0.8424       |
| Religion                             | 1.17       | 0.8522       |

## UNIVARIABLE REGRESSION RESULTS

**Table 3: Univariable Logistic Regression Analysis results of determinants of receipt of all components of the ANC visit**

| Variable                       | Crude OR | p-values | 95% CI    |
|--------------------------------|----------|----------|-----------|
| <b>Age group</b>               |          |          |           |
| 14-17 (rc)                     |          |          |           |
| 18-19                          | 1.682    | 0.078    | 0.94-3.00 |
| <b>Partner's age</b>           |          |          |           |
| Same age (rc)                  |          |          |           |
| Older                          | 0.843    | 0.71     | 0.34-2.08 |
| <b>Ever given birth</b>        |          |          |           |
| No (rc)                        |          |          |           |
| Yes                            | 1.905    | 0.026*   | 1.08-3.36 |
| <b>Education level</b>         |          |          |           |
| Primary (rc)                   |          |          |           |
| Secondary                      | 0.686    | 0.253    | 0.36-1.31 |
| <b>Partner presence</b>        |          |          |           |
| Not staying with partner (rc)  |          |          |           |
| Staying with partner           | 1.212    | 0.514    | 0.68-2.16 |
| <b>Distance to HF</b>          |          |          |           |
| Less than 1 km (rc)            |          |          |           |
| 1km or More                    | 0.697    | 0.277    | 0.36-1.34 |
| <b>Social support</b>          |          |          |           |
| Received no support (rc)       |          |          |           |
| Received support               | 1.772    | 0.054    | 0.99-3.17 |
| <b>Decisions on Healthcare</b> |          |          |           |
| Self (rc)                      |          |          |           |
| Husband                        | 1.520    | 0.235    | 0.76-3.03 |
| Jointly with partner           | 3.192    | 0.026*   | 1.15-8.88 |
| Relatives or in-laws           | 1.408    | 0.371    | 0.66-2.98 |
| <b>Pregnancy wanted</b>        |          |          |           |
| Not wanted (rc)                |          |          |           |
| Wanted                         | 1.338    | 0.308    | 0.76-2.34 |

\* Significant at  $p < 0.05$ ; rc – Reference Category; OR – Odds Ratio

**Table 3: Univariable Logistic Regression Analysis results of determinants of receipt of all components of the ANC visit (...continued)**

| Variable                                    | Crude OR | p-values | 95% CI    |
|---------------------------------------------|----------|----------|-----------|
| <b>Daily earnings</b>                       |          |          |           |
| Earn nothing (rc)                           |          |          |           |
| Earn some money                             | 1.259    | 0.505    | 0.64-2.48 |
| <b>Knowledge of pregnancy danger signs</b>  |          |          |           |
| No knowledge (rc)                           |          |          |           |
| Has knowledge                               | 3.545    | 0.011*   | 1.33-9.46 |
| <b>Knowledge of family planning methods</b> |          |          |           |
| No knowledge (rc)                           |          |          |           |
| Has knowledge                               | 0.650    | 0.363    | 0.26-1.65 |
| <b>Type of health facility</b>              |          |          |           |
| Government (rc)                             |          |          |           |
| Private                                     | 0.509    | 0.318    | 0.14-1.92 |
| Own home or TBA's home                      | 0.424    | 0.447    | 0.05-3.88 |

\* Significant at  $p < 0.05$ ; rc – Reference Category; OR – Odds Ratio

**Table 4: Univariable Logistic Regression Analysis results of determinants of timing of the first ANC visit**

| Variable                      | Crude OR | p-values | 95% CI     |
|-------------------------------|----------|----------|------------|
| <b>Age group</b>              |          |          |            |
| 14-17 (rc)                    |          |          |            |
| 18-19                         | 0.616    | 0.099    | 0.035-1.10 |
| <b>Partner's age</b>          |          |          |            |
| Same age (rc)                 |          |          |            |
| Older                         | 0.253    | 0.038*   | 0.07-0.93  |
| <b>Ever given birth</b>       |          |          |            |
| No (rc)                       |          |          |            |
| Yes                           | 1.800    | 0.043*   | 1.02-3.18  |
| <b>Education level</b>        |          |          |            |
| Primary (rc)                  |          |          |            |
| Secondary                     | 1.594    | 0.153    | 0.84-3.02  |
| <b>Partner presence</b>       |          |          |            |
| Not staying with partner (rc) |          |          |            |
| Staying with partner          | 0.440    | 0.007*   | 0.24-0.80  |

\* Significant at  $p < 0.05$ ; rc – Reference Category; OR – Odds Ratio

**Table 4: Univariable Logistic Regression Analysis results of determinants of timing of the first ANC visit (... continued)**

| <b>Variable</b>                             | <b>Crude OR</b> | <b>p-values</b> | <b>95%CI</b> |
|---------------------------------------------|-----------------|-----------------|--------------|
| <b>Distance to Health facility</b>          |                 |                 |              |
| Less than 1 km (rc)                         |                 |                 |              |
| 1km or More                                 | 1.373           | 0.328           | 0.73-2.59    |
| <b>Social support</b>                       |                 |                 |              |
| Received no support (rc)                    |                 |                 |              |
| Received support                            | 0.799           | 0.448           | 0.45-1.43    |
| <b>Decisions on Healthcare</b>              |                 |                 |              |
| Self (rc)                                   |                 |                 |              |
| Husband                                     | 0.755           | 0.426           | 0.38-1.51    |
| Jointly with partner                        | 1.097           | 0.863           | 0.38-3.13    |
| Relatives or in-laws                        | 2.089           | 0.062           | 0.96-4.52    |
| <b>Pregnancy wanted</b>                     |                 |                 |              |
| Not wanted (rc)                             |                 |                 |              |
| Wanted                                      | 0.708           | 0.231           | 0.40-1.25    |
| <b>Daily earnings</b>                       |                 |                 |              |
| Earn nothing (rc)                           |                 |                 |              |
| Earn some money                             | 0.215           | 0.000*          | 0.10-0.49    |
| <b>Knowledge of pregnancy danger signs</b>  |                 |                 |              |
| No knowledge (rc)                           |                 |                 |              |
| Has knowledge                               | 0.377           | 0.021*          | 0.16-0.86    |
| <b>Knowledge of family planning methods</b> |                 |                 |              |
| No knowledge (rc)                           |                 |                 |              |
| Has knowledge                               | 0.721           | 0.55            | 0.25-2.11    |
| <b>Type of health facility</b>              |                 |                 |              |
| Government (rc)                             |                 |                 |              |
| Private                                     | 0.757           | 0.629           | 0.24-2.34    |
| Own home or TBA's home                      | 1.324           | 0.761           | 0.22-8.12    |

\* Significant at  $p < 0.05$ ; rc – Reference Category; OR – Odds Ratio
